1 A systematic review of mask disinfection and reuse for SARS-CoV-2 (through July 10, 2020)

2

3

4 Miguel Rothe<sup>1†</sup>, Elsa Rohm<sup>1†</sup>, Elizabeth Mitchell<sup>1†</sup>, Noah Bedrosian<sup>1†</sup>, Christine Kelly<sup>1</sup>,

5 Gabrielle String<sup>1</sup>, and Daniele Lantagne<sup>1\*</sup>

6

7 1: Tufts University School of Engineering, Medford, MA, USA, 02155

8 †: These authors contributed equally

9 \*: Corresponding author. +1.617.549.1586, [daniele.lantagne@tufts.edu](mailto:daniele.lantagne@tufts.edu)

10 **TOC Art**

11

SARS-CoV-2 Mask Disinfection and Reuse

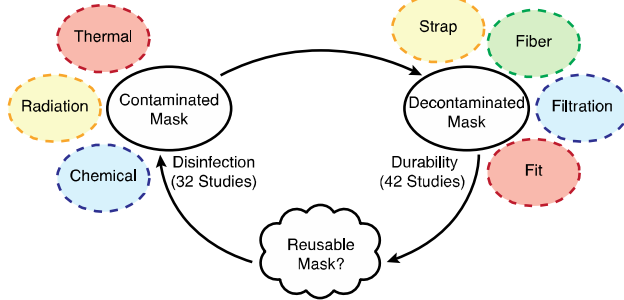

12

13 **ABSTRACT**

14 We conducted a systematic review of hygiene intervention effectiveness against SARS-CoV-2, including  
15 developing inclusion criteria, conducting the search, selecting articles for inclusion, and summarizing  
16 included articles. We reviewed 104,735 articles, and 109 articles meeting inclusion criteria were  
17 identified, with 33 additional articles identified from reference chaining. Herein, we describe results from  
18 58 mask disinfection and reuse studies, where the majority of data were collected using N95 masks.  
19 Please note, no disinfection method consistently removed >3 log of virus irrespective of concentration,  
20 contact time, temperature, and humidity. However, results show it is possible to achieve >3 log reduction  
21 of SARS-CoV-2 using appropriate concentrations and contact times of chemical (ethanol, hydrogen  
22 peroxide, peracetic acid), radiation (PX-UV, UVGI), and thermal (autoclaving, heat) disinfection on N95  
23 masks. N95 mask reuse and failure data indicate that hydrogen peroxide, heat, and UV-GI are promising  
24 for mask reuse, peracetic acid and PX-UV need more data, and autoclaving and ethanol lead to mask  
25 durability failures. Data on other mask types is limited. We thus recommend focusing guidelines and  
26 further research on the use of heat, hydrogen peroxide, and UVGI for N95 mask disinfection/reuse. All of  
27 these disinfection options could be investigated for use in LMIC and humanitarian contexts.

28

29

30

31

32 **Keywords:** COVID-19, mask disinfection, mask reuse, SARS-CoV-2

33

34 **Synopsis:** In resource-limited contexts, N95s are reused. We recommend using heat, hydrogen  
35 peroxide, or UVGI to disinfect and reuse N95 masks.

## 36 **Introduction**

37 In December 2019, novel coronavirus SARS-CoV-2 emerged into the human population, leading to a  
38 worldwide pandemic.<sup>1</sup> Due to lack of medical counter-measures, measures to prevent SARS-CoV-2  
39 transmission include physical distancing, masking, hand hygiene, and surface disinfection.<sup>2</sup>

40 While SARS-CoV-2 has global impact, people living in low- and middle-income countries (LMIC) and  
41 humanitarian contexts are particularly impacted by COVID-19.<sup>3</sup> SARS-CoV-2 transmission is enabled in  
42 areas with overcrowded living situations, poor hygiene conditions, and lack of access to personal  
43 protective equipment (PPE).<sup>4</sup> Moreover, refugees, displaced persons, and people in informal settlements  
44 in LMIC are particularly vulnerable populations, due to living in crowded conditions with weakened  
45 health systems and poor water and sanitation infrastructure.<sup>5, 6</sup>

46 One hygiene intervention increasingly being used in SARS-CoV-2 contexts is cleaning and/or  
47 disinfecting masks for reuse in resource-limited contexts.<sup>7</sup> Since December 2019, there has been an  
48 explosion of research articles related to SARS-CoV-2. The aim of this systematic review was to identify  
49 and summarize information on mask disinfection and reuse, in order to develop evidence-based  
50 recommendations that are both generally applicable, and specifically applicable to LMIC and  
51 humanitarian contexts.

## 52 **METHODS**

53 We conducted a previously described systematic review to identify and summarize WASH intervention  
54 effectiveness at interrupting SARS-CoV-2 transmission routes.<sup>8</sup> The review was developed based on the  
55 guidelines for the Preferred Reporting Items for Systematic Reviews and Meta-Analyses<sup>9</sup> and for mask  
56 disinfection and reuse included: 1) a search strategy; 2) inclusion criteria; 3) a selection and data  
57 extraction strategy; 4) a framework for appraising risk of bias; and, 5) an analysis plan. Each of these  
58 steps is briefly described below (for more information see<sup>8</sup>).

59 **Search Strategy.** The primary databases searched were the NIH COVID-19 Portfolio  
60 (<https://icite.od.nih.gov/covid19/help/data-sources>) and the CDC COVID-19 Research Articles  
61 Downloadable Database  
62 (<https://www.cdc.gov/library/researchguides/2019novelcoronavirus/researcharticles.html>).

63 The first download was on June 10, 2020, including every article published from database creation on  
64 January 22, 2020 until June 10, 2020. The second download occurred on July 10, 2020, and included  
65 every article included in the databases from June 10<sup>th</sup> to July 10<sup>th</sup>, 2020. References were stored in  
66 Microsoft Excel (Redmond, WA, USA) and Endnote (Philadelphia, PA, USA), and duplicates were  
67 deleted. Reference chaining was completed using reference sections of previous systematic reviews  
68 identified.

69 **Inclusion Criteria:** Inclusion criteria were defined according to the populations, interventions,  
70 comparisons, outcomes, and study type (PICOS) framework, a model recommended by the Cochrane  
71 Library to structure rigorous reviews on health-related questions <sup>10</sup>. *Populations* included must have been  
72 affected by COVID-19. Thus, all age, gender, and socioeconomic populations globally were included.  
73 Studies were eligible for inclusion if they included mask disinfection and reuse *interventions*. Specific  
74 *comparisons* were not required for inclusion. Studies were eligible for inclusion if they reported *outcome-*  
75 *level results* related to the mask disinfection and reuse. Both published and pre-print *studies* were  
76 included if they contained primary data on mask disinfection and reuse. Modeling and prediction studies  
77 were not included due to the rapidly changing nature of the COVID-19 pandemic. Only studies in English  
78 were included.

79 **Selection and Data Extraction.** Studies were screened by two independent authors in Title, Abstract, and  
80 Full Text Screening step for meeting the aforementioned PICOS criteria were excluded. Discrepancies  
81 between reviewers were resolved through discussion and consensus.

82 Relevant data were extracted from each article according to the framework in Waddington *et al*<sup>11</sup>  
83 including author and publication details, experimental design, and outcomes relevant to mask disinfection  
84 and reuse. Data were managed using coding sheets developed in Excel and Google Sheets  
85 (Mountainview, CA, USA). Two independent reviewers extracted, discussed, and came to consensus on  
86 all data.

87 **Bias.** Because a large number of articles have been published rapidly on SARS-CoV-2 and mask  
88 disinfection this review includes both published and pre-print research up to July 10, 2020. Given the data  
89 available, it was not possible to systematically assess bias; as such, we divided papers into “published and  
90 peer-reviewed” or “pre-print”.

91 **Analysis:** Data were managed and analyzed in Excel and Sheets. All extracted data were tabulated and  
92 grouped. Where possible, units were converted to enable data comparability, and missing data were  
93 requested from authors.

94

## 95    **RESULTS**

96    From the two downloads of the two databases, a total of 104,735 articles were retrieved. After removal of  
97    8,467 duplicates, 96,268 were title screened. A total of 365 articles passed title and abstract screening,  
98    and 109 passed full text screening in addition to 33 articles reference chained from previous systematic  
99    reviews. Thus, data were extracted from a total of 142 articles, including 58 articles identified on mask  
100    disinfection and reuse.

101    Of the 58<sup>7, 12-68</sup> mask disinfection and reuse articles, ten were reference chained including nine<sup>59-67</sup> from  
102    three systematic reviews<sup>69-71</sup>, and one<sup>68</sup> from another article<sup>15</sup>. Of these 58 articles, 30 (52%) were  
103    preprints at the time of download<sup>12-16, 23-27, 33, 39-45, 49, 50, 55-63, 66</sup>, and one (2%) was data generated by an FDA  
104    contractor with no indication of peer review<sup>68</sup>.

105    Overall, 16 studies measured disinfection and durability<sup>12, 15, 19, 20, 22, 27-30, 33, 36, 47, 49, 51, 62, 64</sup>, 16 studies  
106    measured only disinfection<sup>13, 18, 23, 24, 31, 38, 40, 41, 43, 44, 48, 56, 63, 65-67</sup> and 26 studies measured only durability<sup>7,</sup>  
107    <sup>14, 16, 17, 21, 25, 26, 32, 34, 35, 37, 39, 42, 45, 46, 50, 52-55, 57-61, 68</sup>. Thus, 32 studies measured disinfection and 42 measured  
108    durability.

109

## 110 ***Mask Disinfection***

111 In total, 92 individual mask disinfection tests were conducted across 32 studies<sup>12, 13, 15, 18-20, 22-24, 27-31, 33, 36,</sup>  
112 <sup>38, 40, 41, 43, 44, 47-49, 51, 56, 62-67</sup>. The masks tested included: 75 tests with N95s (82%), 5 (5%) with cloth masks,  
113 4 (4%) with surgical masks, three (3%) with KN95s, three (3%) with Tyvek, and 1 (1%) with a plastic  
114 face shield and 1 (1%) unspecified. Please note 78 (85%) are considered respirators (N95s and KN95s).  
115 Disinfection methods were grouped into three categories: chemical disinfection, radiation disinfection,  
116 and thermal disinfection. In total, 31 chemical disinfection tests were conducted (34% of tests), including  
117 15 tests with various forms of hydrogen peroxide (aerosolized, gas plasma, ionized, vapor), ozone gas  
118 (11), ethanol (2), peracetic acid with hydrogen peroxide (1), peracetic acid (1), and ethylene oxide (1). In  
119 total, 18 radiation disinfection tests were conducted, including 15 with ultraviolet germicidal irradiation  
120 (UVGI) and three with pulsed xenon UV (PX-UV). In total, 43 (47%) thermal disinfection tests were  
121 conducted, including moist heat (17 samples), dry heat (14), steaming (5), microwave generated steam  
122 (MGS) (5), autoclave (1), and heat (1). Please note disinfection efficacy was calculated using log  
123 reductions, or if not available, in a “complete inactivation” binary metric as reported by study authors.  
124 Of the 92 total tests, 21 were conducted with MS-2, 15 with SARS-CoV-2, 12 with IAV, 8 with Phi6, 8  
125 with H1N1, 6 with PCRv, 6 with a mixture (MS2, Phi6, IAV, MHV), 3 with MHV, 3 with H5N1, 2 with  
126 P22, and 1 each with Tulane virus, TGEV, Rotavirus, PPV, HCoV-229E, Canine parvovirus, BVDV, and  
127 adenovirus.

128 As can be seen, while the majority of data were collected on N95s, there was high variability in the  
129 number of disinfectants tested against SARS-CoV-2 and surrogates used for testing. Limiting the results  
130 to N95 masks only, there were 15 tests using SARS-CoV-2, 18 using MS2, eight using Phi6, eight using  
131 H1N1, and six using IAV.

132 In the 15 SARS-CoV-2 N95 mask samples, eight were chemical (hydrogen peroxide<sup>15, 29, 30, 36, 48</sup>, ethanol<sup>15,</sup>  
133 <sup>29</sup>, peracetic acid<sup>30</sup>), four were radiation (PX-UV<sup>13</sup>, UVGI<sup>15, 29, 31</sup>), and three were thermal (autoclave<sup>30</sup>,



134 dry heat<sup>29, 49</sup>). All applications of hydrogen peroxide (10-210 minute exposure), ethanol (spraying,  
135 saturation), and 10% peracetic acid (60 minute exposure) achieved SARS-CoV-2 inactivation or >3 log  
136 reduction. PX-UV and UVGI achieved >3 log reduction with  $\geq 5$  minute contact time. Dry 70°C heat for  
137 50 minutes and autoclaving at 121°C for 15 minutes led to >5 and >6 log reduction, respectively. Please  
138 note all methods tested achieved inactivation (binary) or >3 log reduction except for UVGI at 2 minutes  
139 contact time.

140 In the 18 MS2 results<sup>22, 23, 44, 56, 64, 66, 72</sup>, UVGI for 1-10 minutes did not achieve >3 log reduction, nor did  
141 70°C dry heat for 15-30 minutes. Steam for 10 seconds - 15 minutes did achieve >3 log reduction. Moist  
142 heat at 72-82°C for 30 minutes did achieve >6 log reductions when humidity was >25% or >50%. The  
143 results from the eight H1N1 results<sup>33, 38, 63, 65</sup> were presented in log reduction ranges, not specific log  
144 reductions, which precludes analysis herein. In the eight Phi6 results<sup>27, 40, 56, 72</sup>, moist heat at 72-82°C for  
145 30 minutes achieved <6 or >6 log reduction but inaccurate humidity readings occlude results, 7%  
146 aerosolized hydrogen peroxide had >6 log reductions with 30 minute exposure, and VHP at 16  
147 gram/minute had >4 log after 30-40 minute exposure time; please note UVGI for one minute had only 1.5  
148 log reduction. In the six IAV samples<sup>41, 43, 56, 63</sup>, ozone removed 1-2 log after 40 minute exposure to 20  
149 ppm, and moist heat and MGS achieved >3 log reduction after 30 minutes exposure to 60-82C moist heat  
150 for 30 minutes and 2 minute exposure to MGS.

151 Five tests were conducted on cloth masks<sup>23, 41</sup>, using ozone gas against IAV, and heat/steam against MS2.  
152 Steaming for 15 minutes achieved >15 log reduction (the only method to achieve >3). Four tests were  
153 conducted on surgical masks<sup>24, 64</sup>, using UVGI for 2 minutes, dry heat at 102°C for 60 minutes, VHP for  
154 20 minutes, and MGS for 30 minutes; all achieved >3 log reduction. In three tests on Tyvek<sup>41</sup>, ozone gas  
155 at 20 ppm for 40 minutes led to ~1-2 log reductions of IAV. On one face shield<sup>67</sup>, PX-UV reduced canine  
156 parvovirus by >4 log with 5 minute exposure time. Studies noted radiation disinfection did not deactivate  
157 viruses in a uniform manner due to the complex shapes of masks, thus masks should not be stacked if UV  
158 disinfection is used.

159 Please note no disinfection method consistently removed >3 log reduction of virus irrespective of  
160 concentration, contact time, temperature, and humidity. However, results did show that it is possible to  
161 achieve >3 log reduction of SARS-CoV-2 using appropriate concentrations and contact times of chemical  
162 (ethanol, hydrogen peroxide, peracetic acid), radiation (PX-UV, UVGI), and thermal (autoclaving, heat)  
163 disinfection.

164

165

166 ***Mask reuse***

167 Mask durability was assessed based on four criteria: filtration, fit, fiber resilience, and strap performance.  
168 Disinfection cycles were also noted, and the maximum amount of cycles was determined when a failure  
169 was recorded in any of the four criteria.

170 In total, 159 individual mask reuse tests were conducted in 42 studies<sup>7, 12, 14-17, 19-22, 25-30, 32-37, 39, 42, 45-47, 49-55,</sup>  
171<sup>57-62, 64, 68</sup>. The masks tested included: 114 tests with N95s (72%), an additional four tests with KN95s  
172 (2.5%), seven tests with folded or molded or HKYZ N95s (4.4%), four tests with FFPs (2.5%), and two  
173 tests with respirator fabric (1%). Thus a total of 131 tests (82%) were conducted with respirators.  
174 Additionally, 11 tests were conducted with surgical masks (7%), five with nanofiber filter masks (3.1%),  
175 four with procedure masks (2.5%), three with sterilization wrap (2%) and EX101 masks (2%), and one  
176 (1%) with a cloth mask, and one (1%) unspecified.

177 Disinfection methods were grouped into three categories: chemical disinfection, radiation disinfection,  
178 and thermal disinfection. In total, 65 chemical reuse tests were conducted (41% of tests), including 20  
179 tests with forms of hydrogen peroxide, ethanol (20), isopropyl alcohol (7), bleach (5), ethylene oxide (5),  
180 soap and water (3), ozone gas (3), peracetic acid (1), and household detergent (1). In total, 24 radiation  
181 reuse tests were conducted (15%), including 15 with ultraviolet germicidal irradiation (UVGI), five with  
182 gamma radiation, three with microwaves, and one with pulsed xenon UV (PX-UV). In total, 70 (44%)  
183 thermal reuse tests were conducted, including dry heat (23 samples), autoclave (16), steam (10), moist  
184 heat (9), microwave generated steam (6), heat (3), hot water soak (2), and boiling (1).

185 The majority of data were collected on N95s. Given the wide differences in test conditions, results are  
186 summarized by disinfection agent for N95s only, for agents with >5 samples or those agents identified in  
187 the disinfection efficacy section as achieving >3 log reduction of SARS-CoV-2, including ethanol,  
188 hydrogen peroxide, peracetic acid, PX-UV, UVGI, autoclaving, and heat.

189 Autoclaving (n=14)<sup>14, 30, 34, 42, 45, 55, 57, 59</sup> and ethanol disinfection (n=14)<sup>15-17, 29, 42, 45, 53, 58</sup> led to failures  
190 within two disinfection cycles in 12 and 13 tests, respectively. This indicates these methods cannot be  
191 utilized for N95 reuse.

192 Steam (n=5)<sup>16, 26, 42, 52</sup> and moist heat (n=9)<sup>7, 19, 28, 32, 45, 61, 62</sup> had mixed results, with 3 failures in 1-5 cycles  
193 (but two tests that lasted up to 1-10 cycles), 4 failures in 0-4 cycles (and four tests with no failure in 1-10  
194 cycles and one not recorded), respectively. More research is indicated to understand these results.

195 Hydrogen peroxide disinfection (n=20)<sup>15, 19, 27, 29, 30, 36, 45, 51, 57, 59-61, 68</sup>, dry heat (n=19)<sup>12, 16, 19, 21, 29, 33-35, 42, 45,</sup>  
196 <sup>49, 50, 52, 54</sup>, UVGI (n=13)<sup>15, 16, 29, 35, 42, 45, 46, 52, 59-62</sup>, and ethylene oxide (n=5)<sup>19, 59-61</sup> all had promising results.

197 With hydrogen peroxide, no failures were seen in the course of the study in 14 tests (1-14 cycles), two  
198 failed at 14 and 29 cycles, and – using HPGP and HPAH, there were failures at 1-4 and 9 cycles,  
199 respectively. In dry heat tests, 15 masks lasted the maximum number of times tested (1-20 cycles), and  
200 four failed with 0-3 disinfection cycles. In UVGI tests, 10 masks lasted the number of times tested (1-20  
201 cycles), and three failed within 2 disinfection cycles. In ethylene oxide tests, none failed within the testing  
202 (1-3 cycles). Please note peracetic acid and PX-UV had one test each, with no failures in the 10 cycles  
203 tested.

204

205 **Summary**

206 Our overall goal was to complete a systematic review of transmission pathways of SARS-CoV-2 that  
207 could be interrupted with WASH interventions, with a focus on LMIC and humanitarian contexts. After  
208 completing title, abstract, and full-text review of 104,735 articles, 109 articles meeting inclusion criteria  
209 were identified, with 33 additional articles identified from reference chaining. Information on surface  
210 disinfection has been published separately<sup>8</sup>; herein we described results from 58 mask disinfection and  
211 reuse summaries.

212 We identified a large amount of data on mask disinfection and reuse, although much was not comparable  
213 as many studies lacked specificity on methods, and tested a wide range of conditions on a small number  
214 of samples. This led to data from multiple articles summarized to generate themes. Overall, when  
215 comparing the list of efficacious disinfectants (ethanol, hydrogen peroxide, peracetic acid, PX-UV,  
216 UVGI, autoclaving, and heat) with the reuse information (hydrogen peroxide, heat, and UV-GI promising,  
217 peracetic acid and PX-UV need more information, and autoclaving and ethanol lead to failures), it is  
218 recommended to focus guidelines and future research on the use of heat, hydrogen peroxide, and UVGI.  
219 For radiation, non-uniform distribution across N95 masks was noted, when can be managed by rotation  
220 and ensuring no shadowing by straps/other masks<sup>16</sup>. All of these options could be investigated for use in  
221 LMIC and humanitarian contexts. Further research is recommended on non-N95 masks, as there is a lack  
222 of research on cloth masks in particular.

223 Limitations to this work include that pre-prints were included in review, bias was not assessed beyond  
224 noting pre-print percentage, and after completing the review we (based on information available)  
225 determined to focus this sub-paper on mask disinfection and reuse. Additionally, there is likely more  
226 relevant data published after the final download date of July 10, 2020. We plan to update this review for a  
227 second publication in early-mid 2021. We do not feel these limitations impact the results presented  
228 herein. Please note all extracted data is available in an Excel file in Supplementary Information for open-  
229 access use.

230 In summary, while SARS-CoV-2 has had a global impact, people living in LMIC are disproportionately  
231 impacted due to inability to adapt recommended safety measures, lack of resources, and underlying health  
232 conditions. We identified that no disinfection method consistently removed >3 log reduction of SARS-  
233 CoV-2 virus irrespective of concentration, contact time, temperature, and humidity. However, results did  
234 show that it is possible to achieve >3 log reduction of SARS-CoV-2 using appropriate concentrations and  
235 contact times of chemical (ethanol, hydrogen peroxide, peracetic acid), radiation (PX-UV, UVGI), and  
236 thermal (autoclaving, heat) disinfection, and that hydrogen peroxide, heat, and UV-GI have promise to  
237 allow mask reuse without mask failures. Further research on mask disinfection and reuse – on a range of  
238 masks – is needed to develop evidence-based recommendations to protect people by ensuring safety of  
239 PPE in contexts where masks are re-used.

240

241 **Acknowledgements**

242

243 The authors would like to thank the funders of this work, including: TISCH College of Civic Life at Tufts

244 University (funding for Bedrosian, Rohm, Rothe), D. Lantagne discretionary funding (funding for

245 Bedrosian, Mitchell, Rohm, Rothe), and NSF 1657218 (funding for Kelly).

246

247

248

249 **SUPPLEMENTAL INFORMATION**

250

251 Table S1. Mask disinfection and reuse table

252



## 253 References

- 254 1. WHO Timeline - WHO's COVID-19 response. [https://www.who.int/news-room/detail/29-06-](https://www.who.int/news-room/detail/29-06-2020-covidtimeline)  
255 [2020-covidtimeline](https://www.who.int/news-room/detail/29-06-2020-covidtimeline)
- 256 2. WHO Coronavirus Disease (COVID-19) Situation Report 172. [https://www.who.int/docs/default-](https://www.who.int/docs/default-source/coronaviruse/situation-reports/20200710-covid-19-sitrep-172.pdf?sfvrsn=70724b90_2)  
257 [source/coronaviruse/situation-reports/20200710-covid-19-sitrep-172.pdf?sfvrsn=70724b90\\_2](https://www.who.int/docs/default-source/coronaviruse/situation-reports/20200710-covid-19-sitrep-172.pdf?sfvrsn=70724b90_2)
- 258 3. Walker, P. G. T.; Whittaker, C.; Watson, O. J.; Baguelin, M.; Winskill, P.; Hamlet, A.; Djafaara,  
259 B. A.; Cucunubá, Z.; Olivera Mesa, D.; Green, W.; Thompson, H.; Nayagam, S.; Ainslie, K. E.  
260 C.; Bhatia, S.; Bhatt, S.; Boonyasiri, A.; Boyd, O.; Brazeau, N. F.; Cattarino, L.; Cuomo-  
261 Dannenburg, G.; Dighe, A.; Donnelly, C. A.; Dorigatti, I.; van Elsland, S. L.; FitzJohn, R.; Fu,  
262 H.; Gaythorpe, K. A. M.; Geidelberg, L.; Grassly, N.; Haw, D.; Hayes, S.; Hinsley, W.; Imai, N.;  
263 Jorgensen, D.; Knock, E.; Laydon, D.; Mishra, S.; Nedjati-Gilani, G.; Okell, L. C.; Unwin, H. J.;  
264 Verity, R.; Vollmer, M.; Walters, C. E.; Wang, H.; Wang, Y.; Xi, X.; Lalloo, D. G.; Ferguson, N.  
265 M.; Ghani, A. C., The impact of COVID-19 and strategies for mitigation and suppression in low-  
266 and middle-income countries. *Science (New York, N.Y.)* **2020**, *369*, (6502), 413-422.
- 267 4. Corburn, J.; Vlahov, D.; Mberu, B.; Riley, L.; Caiaffa, W. T.; Rashid, S. F.; Ko, A.; Patel, S.;  
268 Jukur, S.; Martínez-Herrera, E.; Jayasinghe, S.; Agarwal, S.; Nguendo-Yongsi, B.; Weru, J.;  
269 Ouma, S.; Edmundo, K.; Oni, T.; Ayad, H., Slum Health: Arresting COVID-19 and Improving  
270 Well-Being in Urban Informal Settlements. *J Urban Health* **2020**, *97*, (3), 348-357.
- 271 5. Hargreaves, S.; Zenner, D.; Wickramage, K.; Deal, A.; Hayward, S. E., Targeting COVID-19  
272 interventions towards migrants in humanitarian settings. *Lancet Infectious Diseases* **2020**, *20*, (6),  
273 645-646.
- 274 6. Islam, M. N.; Inan, T. T.; Islam, A. K. M. N., COVID-19 and the Rohingya Refugees in  
275 Bangladesh: The Challenges and Recommendations *Asian Pacific Journal of Public Health* **2020**,  
276 <https://doi.org/10.1177/1010539520932707>.
- 277 7. Anderegg, L. C.; Meisenhelder, C. O.; Ngooi, C. O.; Liao, L.; Xiao, W.; Chu, S.; Cui, Y.; Doyle,  
278 J. M., A Scalable Method of Applying Heat and Humidity for Decontamination of N95  
279 Respirators During the COVID-19 Crisis. *medRxiv* **2020**.
- 280 8. Bedrosian, N.; Mitchell, E.; Rohm, E.; Rothe, M.; Kelly, C.; String, G.; Lantagne, D., A  
281 systematic review of surface contamination, stability, and disinfection data on SARS-CoV-2  
282 (January 1 - July 10, 2020). *Environ Sci Technol* **Submitted, In Review**.
- 283 9. Moher, D.; Liberati, A.; Tetzlaff, J.; Altman, D. G., Preferred reporting items for systematic  
284 reviews and meta-analyses: the PRISMA statement. *BMJ* **2009**, *339*, (July 21), b2535-b2535.
- 285 10. Higgins, J.; Thomas, J., *Cochrane Handbook for Systematic Reviews of Interventions*.
- 286 11. Waddington, H.; Snilstveit, B.; Hombrados, J.; Vojtkova, M.; Anderson, J.; White, H. *Farmer*  
287 *Field Schools for Improving Farming Practices and Farmer Outcomes in Low- and Middle-*  
288 *Income Countries*; Campbell Collaboration: 2014.
- 289 12. Oh, C.; Araud, E.; Puthussery, J. V.; Bai, H.; Clark, G. G.; Verma, V.; Nguyen, T. H., Dry Heat  
290 as a Decontamination Method for N95 Respirator Reuse. *chemRxiv* **2020**.
- 291 13. Simmons, S.; Carrion, R.; Alfson, K.; Staples, H.; Jinadatha, C.; Jarvis, W.; Sampathkumar, P.;  
292 Chemaly, R.; Khawaja, F.; Povroznik, M.; Jackson, S.; Kaye, K.; Rodriguez, R.; Stibich, M.,  
293 Disinfection effect of pulsed xenon ultraviolet irradiation on SARS-CoV-2 and implications for  
294 environmental risk of COVID-19 transmission. *medRxiv* **2020**, 2020.05.06.20093658.
- 295 14. Bopp, N. E.; Bouyer, D. H.; Gibbs, C. M.; Nichols, J. E.; Ntiforo, C. A.; Grimaldo, M. A.,  
296 Multicycle Autoclave Decontamination of N95 Filtering Facepiece Respirators. *Applied Biosafety*  
297 **2020**, 1535676020924171.
- 298 15. Smith, J. S.; Hanseler, H.; Welle, J.; Rattray, R.; Campbell, M.; Brotherton, T.; Moudgil, T.;  
299 Pack, T. F.; Wegmann, K.; Jensen, S.; Jin, J. S.; Bifulco, C. B.; Prah, S. A.; Fox, B. A.; Stucky,  
300 N. L., Effect of various decontamination procedures on disposable N95 mask integrity and  
301 SARS-CoV-2 infectivity. *medRxiv* **2020**.

- 302 16. Liao, L.; Xiao, W.; Zhao, M.; Yu, X.; Wang, H.; Wang, Q.; Chu, S.; Cui, Y., Can N95  
303 Respirators Be Reused after Disinfection? How Many Times? *ACS nano* **2020**, *14*, (5), 6348-  
304 6356.
- 305 17. Lenormand, R.; Lenormand, G., Effect of ethanol cleaning on the permeability of FFP2 mask.  
306 **2020**.
- 307 18. Cadnum, J. L.; Li, D. F.; Jones, L. D.; Redmond, S. N.; Pearlmutter, B.; Wilson, B. M.; Donskey,  
308 C. J., Evaluation of Ultraviolet-C Light for Rapid Decontamination of Airport Security Bins in  
309 the Era of SARS-CoV-2. *Pathogens and Immunity* **2020**, *5*, (1), 133-142.
- 310 19. Lee, J.; Bong, C.; Bae, P. K.; Abafog, A. T.; Baek, S. H.; Shin, Y.-B.; Park, M. S.; Park, S., Fast  
311 and easy disinfection of coronavirus-contaminated face masks using ozone gas produced by a  
312 dielectric barrier discharge plasma generator. *medRxiv* **2020**.
- 313 20. Wigginton, K. R.; Arts, P. J.; Clack, H.; Fitzsimmons, W. J.; Gamba, M.; Harrison, K. R.; LeBar,  
314 W.; Luring, A. S.; Li, L.; Roberts, W. W.; Rockey, N.; Torreblanca, J.; Young, C.; Anderegg, L.  
315 C.; Cohn, A.; Doyle, J. M.; Meisenhelder, C. O.; Raskin, L.; Love, N. G.; Kaye, K. S., Validation  
316 of N95 filtering facepiece respirator decontamination methods available at a large university  
317 hospital. *medRxiv* **2020**, 2020.04.28.20084038.
- 318 21. Loh, M.; Clark, R.; Cherrie, J. W., Heat treatment for reuse of disposable respirators during  
319 Covid-19 pandemic: Is filtration and fit adversely affected? *medRxiv* **2020**, 2020.04.22.20074989.
- 320 22. Zulauf, K. E.; Green, A. B.; Ba, A. N. N.; Jagdish, T.; Reif, D.; Seeley, R.; Dale, A.; Kirby, J. E.,  
321 Microwave-Generated Steam Decontamination of N95 Respirators Utilizing Universally  
322 Accessible Materials. *medRxiv* **2020**, 2020.04.22.20076117.
- 323 23. Li, D. F.; Cadnum, J. L.; Redmond, S. N.; Jones, L. D.; Donskey, C. J., It's not the heat, it's the  
324 humidity: Effectiveness of a rice cooker-steamer for decontamination of cloth and surgical face  
325 masks and N95 respirators. *American Journal of Infection Control* **2020**, *48*, (7), 854-855.
- 326 24. Ludwig-Begall, L. F.; Wielick, C.; Dams, L.; Nauwynck, H.; Demeuldre, P.-F.; Napp, A.;  
327 Haubruge, E.; Thiry, E., Decontamination of face masks and filtering facepiece respirators via  
328 ultraviolet germicidal irradiation, hydrogen peroxide vaporisation, and use of dry heat inactivates  
329 an infectious SARS-CoV-2 surrogate virus. . *medRxiv* **2020**.
- 330 25. Kumar, A.; Saneetha, D. N.; Yuvaraj, R.; Menaka, M.; Subramanian, V.; Venkatraman, B., Effect  
331 of gamma sterilization on filtering efficiency of various respiratory face-masks. *medRxiv* **2020**,  
332 2020.06.04.20121830.
- 333 26. Ma, Q.; Shan, H.; Zhang, C.; Zhang, H.; Li, G.; Yang, R.; Chen, J., Decontamination of face  
334 masks with steam for mask reuse in fighting the pandemic COVID-19: Experimental supports.  
335 *Journal of Medical Virology* **2020**.
- 336 27. Derr, T. H.; James, M. A.; Kuny, C. V.; Kandel, P. P.; Beckman, M. D.; Hockett, K. L.; Bates, M.  
337 A.; Szpara, M. L., Aerosolized Hydrogen Peroxide Decontamination of N95 Respirators, with  
338 Fit-Testing and Virologic Confirmation of Suitability for Re-Use During the COVID-19  
339 Pandemic. *medRxiv* **2020**.
- 340 28. Massey, T.; Borucki, M.; Paik, S.; Fuhrer, K.; Bora, M.; Kane, S.; Haque, R.; Baxamusa, S. H.,  
341 Quantitative form and fit of N95 filtering facepiece respirators are retained and coronavirus  
342 surrogate is inactivated after heat treatments. *medRxiv* **2020**, 2020.04.15.20065755.
- 343 29. Fischer, R. J.; Morris, D. H.; Doremalen, N. v.; Sarchette, S.; Matson, M. J.; Bushmaker, T.;  
344 Yinda, C. K.; Seifert, S. N.; Gamble, A.; Williamson, B. N.; Judson, S. D.; Wit, E. d.; Lloyd-  
345 Smith, J. O.; Munster, V. J., Effectiveness of N95 Respirator Decontamination and Reuse against  
346 SARS-CoV-2 Virus. *Emerging Infectious Diseases* **2020**.
- 347 30. Kumar, A.; Kasloff, S. B.; Leung, A.; Cutts, T.; Strong, J. E.; Hills, K.; Vazquez-Grande, G.;  
348 Rush, B.; Lothar, S.; Zarychanski, R.; Krishnan, J., N95 Mask Decontamination using Standard  
349 Hospital Sterilization Technologies. *medRxiv* **2020**.
- 350 31. Ozog, D. M.; Sexton, J. Z.; Narla, S.; Pretto-Kernahan, C. D.; Mirabelli, C.; Lim, H. W.;  
351 Hamzavi, I. H.; Tibbetts, R. J.; Mi, Q.-S., The Effect of Ultraviolet C Radiation Against SARS-  
352 CoV-2 Inoculated N95 Respirators. *medRxiv* **2020**, 2020.05.31.20118588.

- 353 32. Doshi, S.; Banavar, S. P.; Flaum, E.; Kumar, S.; Chen, T.; Prakash, M., Applying Heat and  
354 Humidity using Stove Boiled Water for Decontamination of N95 Respirators in Low Resource  
355 Settings. *medRxiv* **2020**.
- 356 33. Xiang, Y.; Song, Q.; Gu, W., Decontamination of surgical face masks and N95 respirators by dry  
357 heat pasteurization for one hour at 70°C. *American Journal of Infection Control* **2020**, *48*, (8),  
358 880-882.
- 359 34. Meisenhelder, C.; Anderegg, L.; Preecha, A.; Ngooi, C. O.; Liao, L.; Xiao, W.; Chu, S.; Cui, Y.;  
360 Doyle, J. M., Effect of Dry Heat and Autoclave Decontamination Cycles on N95 FFRs. *medRxiv*  
361 **2020**, 2020.05.29.20114199.
- 362 35. Price, A. D.; Cui, Y.; Liao, L.; Xiao, W.; Yu, X.; Wang, H.; Zhao, M.; Wang, Q.; Chu, S.; Chu,  
363 L. F., Is the fit of N95 facial masks effected by disinfection? A study of heat and UV disinfection  
364 methods using the OSHA protocol fit test. *medRxiv* **2020**, 2020.04.14.20062810.
- 365 36. Oral, E.; Wannomae, K. K.; Connolly, R. L.; Gardecki, J. A.; Leung, H. M.; Muratoglu, O. K.;  
366 Griffiths, A.; Honko, A. N.; Avena, L. E.; McKay, L. G.; Flynn, N.; Storm, N.; Downs, S. N.;  
367 Jones, R.; Emmal, B., Vapor H2O2 sterilization as a decontamination method for the reuse of  
368 N95 respirators in the COVID-19 emergency. *medRxiv* **2020**, 2020.04.11.20062026.
- 369 37. Manning, E. P.; Stephens, M. D.; Patel, S.; Dufresne, S.; Silver, B.; Gerbarg, P.; Gerbarg, Z.;  
370 Cruz, C. D.; Sharma, L., Disinfection of N95 Respirators with Ozone. *medRxiv* **2020**,  
371 2020.05.28.20097402.
- 372 38. Cheng, V. C. C.; Wong, S.-C.; Kwan, G. S. W.; Hui, W.-T.; Yuen, K.-Y., Disinfection of N95  
373 respirators by ionized hydrogen peroxide during pandemic coronavirus disease 2019 (COVID-19)  
374 due to SARS-CoV-2. *The Journal of Hospital Infection* **2020**, *105*, (2), 358-359.
- 375 39. Cramer, A.; Tian, E.; Yu, S. H.; Galanek, M.; Lamere, E.; Li, J.; Gupta, R.; Short, M. P.,  
376 Disposable N95 Masks Pass Qualitative Fit-Test But Have Decreased Filtration Efficiency after  
377 Cobalt-60 Gamma Irradiation. *medRxiv* **2020**, 2020.03.28.20043471.
- 378 40. Kenney, P.; Chan, B. K.; Kortright, K.; Cintron, M.; Havill, N.; Russi, M.; Epright, J.; Lee, L.;  
379 Balcesak, T.; Martinello, R., Hydrogen Peroxide Vapor sterilization of N95 respirators for reuse.  
380 *medRxiv* **2020**.
- 381 41. Blanchard, E. L.; Lawrence, J. D.; Noble, J. A.; Xu, M.; Joo, T.; Ng, N. L.; Schmidt, B. E.;  
382 Santangelo, P. J.; Finn, M. G., Enveloped Virus Inactivation on Personal Protective Equipment by  
383 Exposure to Ozone. *medRxiv* **2020**.
- 384 42. Suen, C. Y.; Leung, H. H.; Lam, K. W.; Hung, K. P.; Chan, M. Y.; Kwan, J. K. C., Feasibility of  
385 Reusing Surgical Mask Under Different Disinfection Treatments. *medRxiv* **2020**,  
386 2020.05.16.20102178.
- 387 43. Oral, E.; Wannomae, K. K.; Gil, D.; Connolly, R. L.; Gardecki, J.; Leung, H. M.; Muratoglu, O.  
388 K.; Tsurumi, A.; Rahme, L. G.; Jaber, T.; Collins, C.; Budzilowicz, A.; Gjore, J., Efficacy of  
389 moist heat decontamination against various pathogens for the reuse of N95 respirators in the  
390 COVID-19 emergency. *medRxiv* **2020**, 2020.05.13.20100651.
- 391 44. Li, D. F.; Cadnum, J. L.; Redmond, S. N.; Jones, L. D.; Pearlmutter, B.; Haq, M. F.; Donskey, C.  
392 J., Steam treatment for rapid decontamination of N95 respirators and medical face masks.  
393 *American Journal of Infection Control* **2020**, *48*, (7), 855-857.
- 394 45. Chen, P. Z.; Ngan, A.; Manson, N.; Maynes, J. T.; Borschel, G. H.; Rotstein, O. D.; Gu, F. X.,  
395 Transmission of aerosols through pristine and reprocessed N95 respirators. *medRxiv* **2020**,  
396 2020.05.14.20094821.
- 397 46. Ozog, D.; Parks-Miller, A.; Kohli, I.; Lyons, A. B.; Narla, S.; Torres, A. E.; Levesque, M.; Lim,  
398 H. W.; Hamzavi, I. H., The importance of fit testing in decontamination of N95 respirators: A  
399 cautionary note. *Journal of the American Academy of Dermatology* **2020**, *83*, (2), 672-674.
- 400 47. Dave, N.; Pascavis, K. S.; Patterson, J. M.; Kozicki, M.; Wallace, D. W.; Chowdhury, A.;  
401 Abbaszadegan, M.; Alum, A.; Herckes, P.; Zhang, Z.; Chang, J.; Ewell, C.; Smith, T.; Naufel, M.,  
402 Characterization of a novel, low-cost, scalable ozone gas system for sterilization of N95  
403 respirators and other COVID-19 related use cases. *medRxiv* **2020**, 2020.06.24.20139469.

- 404 48. Ibáñez-Cervantes, G.; Bravata-Alcántara, J. C.; Nájera-Cortés, A. S.; Meneses-Cruz, S.; Delgado-  
405 Balbuena, L.; Cruz-Cruz, C.; Durán-Manuel, E. M.; Cureño-Díaz, M. A.; Gómez-Zamora, E.;  
406 Chávez-Ocaña, S.; Sosa-Hernández, O.; Aguilar-Rojas, A.; Bello-López, J. M., Disinfection of  
407 N95 masks artificially contaminated with SARS-CoV-2 and ESKAPE bacteria using hydrogen  
408 peroxide plasma: Impact on the reutilization of disposable devices. *American Journal of Infection  
409 Control* **2020**.
- 410 49. Daeschler, S. C.; Manson, N.; Joachim, K.; Chin, A. W. H.; Chan, K.; Chen, P. Z.; Tajdaran, K.;  
411 Mirmoeini, K.; Zhang, J. J.; Maynes, J. T.; Science, M.; Darbandi, A.; Stephens, D.; Poon, L. L.  
412 M.; Gu, F.; Borschel, G. H., Reprocessing N95 Respirators During the COVID-19 Pandemic:  
413 Moist Heat Inactivates SARS-CoV-2 and Maintains N95 Filtration. *medRxiv* **2020**,  
414 2020.05.25.20112615.
- 415 50. Pascoe, M. J.; Robertson, A.; Crayford, A.; Durand, E.; Steer, J.; Castelli, A.; Wesgate, R.;  
416 Evans, S. L.; Porph, A.; Maillard, J.-Y., Dry heat and microwave-generated steam protocols for  
417 the rapid decontamination of respiratory personal protective equipment in response to COVID-  
418 19-related shortages. *Journal of Hospital Infection* **2020**, *106*, (1), 10-19.
- 419 51. Dave, N.; Pascavis, K. S.; Patterson, J. M.; Wallace, D. W.; Chowdhury, A.; Abbaszadegan, M.;  
420 Alum, A.; Herckes, P.; Zhang, Z.; Kozicki, M.; Forzani, E.; Mora, S. J.; Chang, J.; Ewell, C.;  
421 Smith, T.; Naufel, M., Characterization of a novel, low-cost, scalable vaporized hydrogen  
422 peroxide system for sterilization of N95 respirators and other COVID-19 related personal  
423 protective equipment. *medRxiv* **2020**, 2020.06.24.20139436.
- 424 52. Ou, Q.; Pei, C.; Chan Kim, S.; Abell, E.; Pui, D. Y. H., Evaluation of decontamination methods  
425 for commercial and alternative respirator and mask materials – view from filtration aspect.  
426 *Journal of Aerosol Science* **2020**, *150*, 105609.
- 427 53. Ullah, S.; Ullah, A.; Lee, J.; Jeong, Y.; Hashmi, M.; Zhu, C.; Joo, K. I.; Cha, H. J.; Kim, I. S.,  
428 Reusability Comparison of Melt-Blown vs Nanofiber Face Mask Filters for Use in the  
429 Coronavirus Pandemic. *ACS Applied Nano Materials* **2020**, *3*, (7), 7231-7241.
- 430 54. Yim, W.; Cheng, D.; Patel, S.; Kui, R.; Meng, Y. S.; Jokerst, J. V., Assessment of N95 and K95  
431 respirator decontamination: fiber integrity, filtration efficiency, and dipole charge density.  
432 *medRxiv* **2020**, 2020.07.07.20148551.
- 433 55. Wang, D.; Sun, B.-C.; Wang, J.-X.; Zhou, Y.-Y.; Chen, Z.-W.; Fang, Y.; Yue, W.-H.; Liu, S.-M.;  
434 Liu, K.-Y.; Zeng, X.-F.; Chu, G.-W.; Chen, J.-F., Can Masks Be Reused After Hot Water  
435 Decontamination During the COVID-19 Pandemic? *Engineering* **2020**.
- 436 56. Rockey, N.; Arts, P. J.; Li, L.; Harrison, K. R.; Langenfeld, K.; Fitzsimmons, W. J.; Lauring, A.  
437 S.; Love, N. G.; Kaye, K. S.; Raskin, L.; Roberts, W. W.; Hegarty, B.; Wigginton, K. R.,  
438 Humidity and deposition solution play a critical role in virus inactivation by heat treatment on  
439 N95 respirators. *medRxiv* **2020**, 2020.06.22.20137448.
- 440 57. Jatta, M.; Kiefer, C.; Patolia, H.; Pan, J.; Harb, C.; Marr, L. C.; Baffoe-Bonnie, A., N95  
441 Reprocessing by Low Temperature Sterilization with 59% Vaporized Hydrogen Peroxide during  
442 the 2020 COVID-19 Pandemic. *American Journal of Infection Control* **2020**.
- 443 58. Grinshpun, S. A.; Yermakov, M.; Khodoun, M., Autoclave sterilization and ethanol treatment of  
444 re-used surgical masks and N95 respirators during COVID-19: impact on their performance and  
445 integrity. *Journal of Hospital Infection* **2020**, *105*, (4), 608-614.
- 446 59. Viscusi, D. J.; King, W. P.; Shaffer, R. E., Effect of Decontamination on the Filtration Efficiency  
447 of Two Filtering Facepiece Respirator Models. **2007**, *24*, 15.
- 448 60. Viscusi, D. J.; Bergman, M. S.; Eimer, B. C.; Shaffer, R. E., Evaluation of Five Decontamination  
449 Methods for Filtering Facepiece Respirators. *Annals of Occupational Hygiene* **2009**, *53*, (8), 815-  
450 827.
- 451 61. Bergman, M. S.; Viscusi, D. J.; Heimbuch, B. K.; Wander, J. D.; Sambol, A. R.; Shaffer, R. E.,  
452 Evaluation of Multiple (3-Cycle) Decontamination Processing for Filtering Facepiece  
453 Respirators. *Journal of Engineered Fibers and Fabrics* **2010**, *5*, (4), 155892501000500405.



- 454 62. Lore, M. B.; Heimbuch, B. K.; Brown, T. L.; Wander, J. D.; Hinrichs, S. H., Effectiveness of  
455 three decontamination treatments against influenza virus applied to filtering facepiece respirators.  
456 *The Annals of Occupational Hygiene* **2012**, *56*, (1), 92-101.
- 457 63. Heimbuch, B. K.; Wallace, W. H.; Kinney, K.; Lumley, A. E.; Wu, C.-Y.; Woo, M.-H.; Wander,  
458 J. D., A pandemic influenza preparedness study: use of energetic methods to decontaminate  
459 filtering facepiece respirators contaminated with H1N1 aerosols and droplets. *American Journal*  
460 *of Infection Control* **2011**, *39*, (1), e1-9.
- 461 64. Fisher, E. M.; Williams, J. L.; Shaffer, R. E., Evaluation of Microwave Steam Bags for the  
462 Decontamination of Filtering Facepiece Respirators. *PLoS ONE* **2011**, *6*, (4).
- 463 65. Mills, D.; Harnish, D. A.; Lawrence, C.; Sandoval-Powers, M.; Heimbuch, B. K., Ultraviolet  
464 germicidal irradiation of influenza-contaminated N95 filtering facepiece respirators. *American*  
465 *Journal of Infection Control* **2018**, *46*, (7), e49-e55.
- 466 66. Fisher, E. M.; Shaffer, R. E., A method to determine the available UV-C dose for the  
467 decontamination of filtering facepiece respirators. *Journal of Applied Microbiology* **2011**, *110*,  
468 (1), 287-295.
- 469 67. Jinadatha, C.; Simmons, S.; Dale, C.; Ganachari-Mallappa, N.; Villamaria, F. C.; Goulding, N.;  
470 Tanner, B.; Stachowiak, J.; Stibich, M., Disinfecting personal protective equipment with pulsed  
471 xenon ultraviolet as a risk mitigation strategy for health care workers. *American Journal of*  
472 *Infection Control* **2015**, *43*, (4), 412-414.
- 473 68. Brooks; Brends, Final Report for the Bioquell Hydrogen Peroxide Vapor (HPV) Decontamination  
474 for Reuse of N95 Respirators. *Final Report* **2016**, 46.
- 475 69. Derraik, J. G. B.; Anderson, W. A.; Connelly, E. A.; Anderson, Y. C., Rapid evidence summary  
476 on SARS-CoV-2 survivorship and disinfection, and a reusable PPE protocol using a double-hit  
477 process. *medRxiv* **2020**, 2020.04.02.20051409.
- 478 70. Schöpe, H. J.; Klopotek, M., Strategies for the reuse of N95 and N99 respiratory masks during the  
479 COVID-19 pandemic. *arXiv:2004.00769 [physics]* **2020**.
- 480 71. Carlos Rubio-Romero, J.; Del Carmen Pardo-Ferreira, M.; Antonio Torrecilla García, J.; Calero-  
481 Castro, S., Disposable masks: Disinfection and sterilization for reuse, and non-certified  
482 manufacturing, in the face of shortages during the COVID-19 pandemic. *Safety Science* **2020**,  
483 104830.
- 484 72. Cadnum, J. L.; Li, D. F.; Redmond, S. N.; John, A. R.; Pearlmutter, B.; Donskey, C. J.,  
485 Effectiveness of Ultraviolet-C Light and a High-Level Disinfection Cabinet for Decontamination  
486 of N95 Respirators. *Pathogens and Immunity* **2020**, *5*, (1), 52-67.
- 487
